# Supplementary material for: Striatal Dopamine Loss in Early Parkinson's Disease: Systematic Review and Novel Analysis of Dopamine Transporter Imaging
Source: PubMed Central journal article supplement (PMC10105104; doi:10.1002/mdc3.13687), 2023-02-17

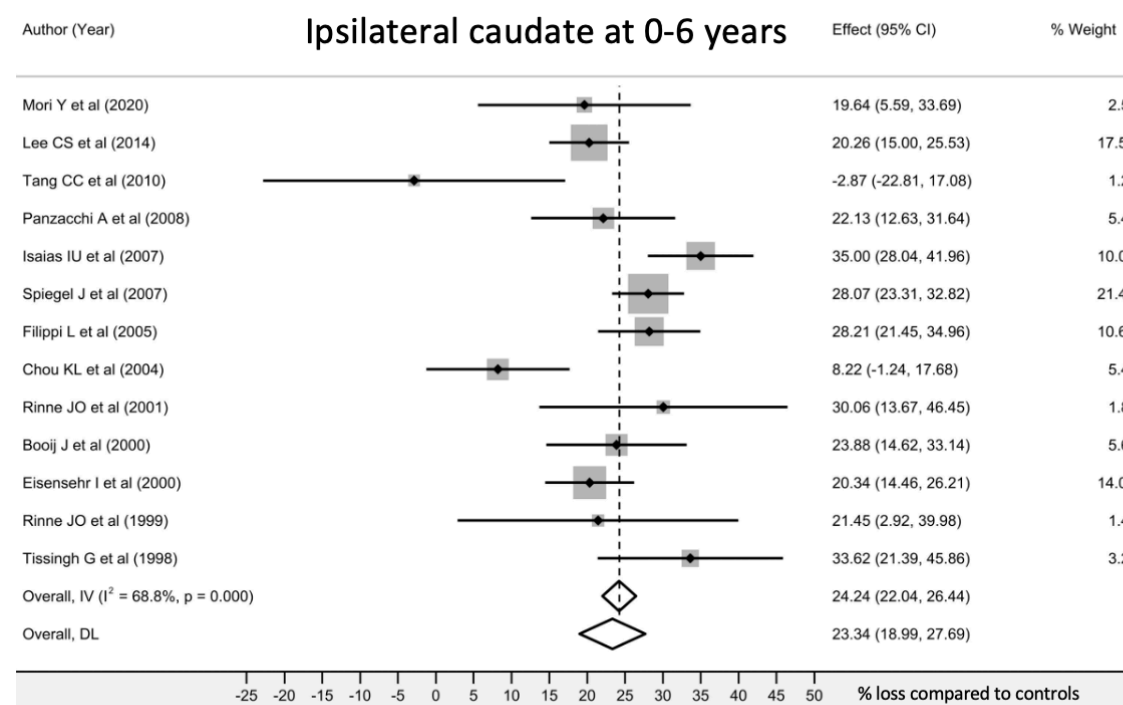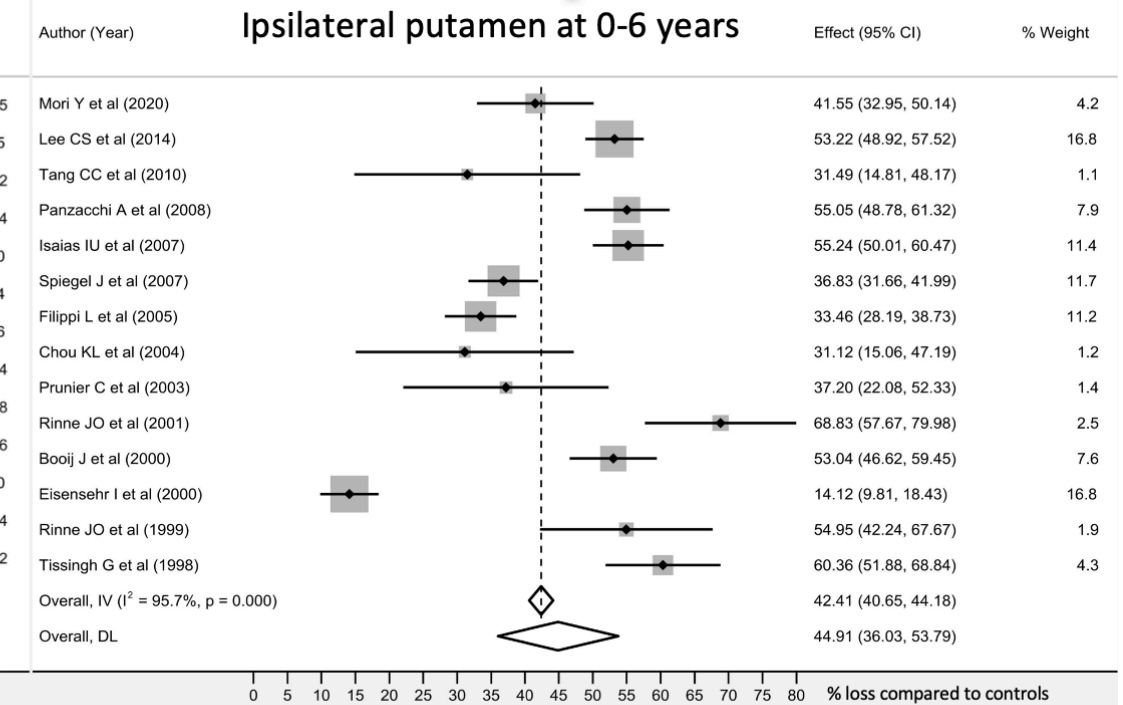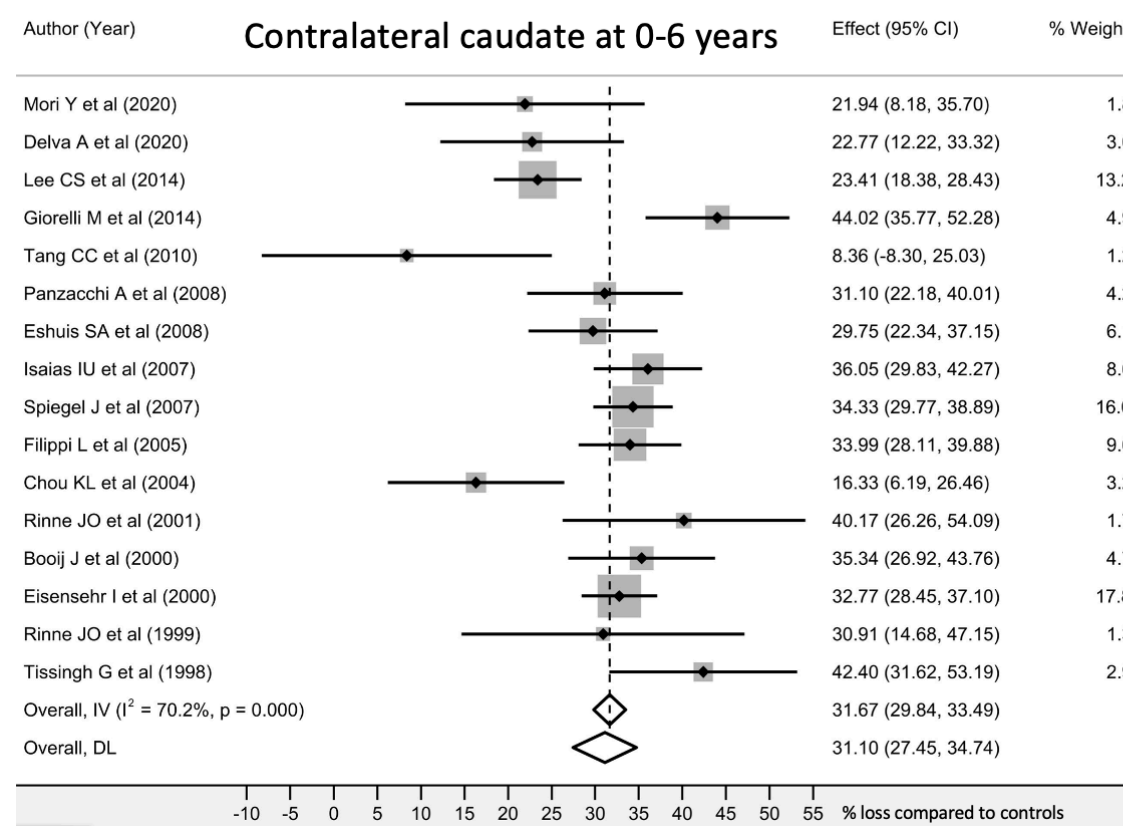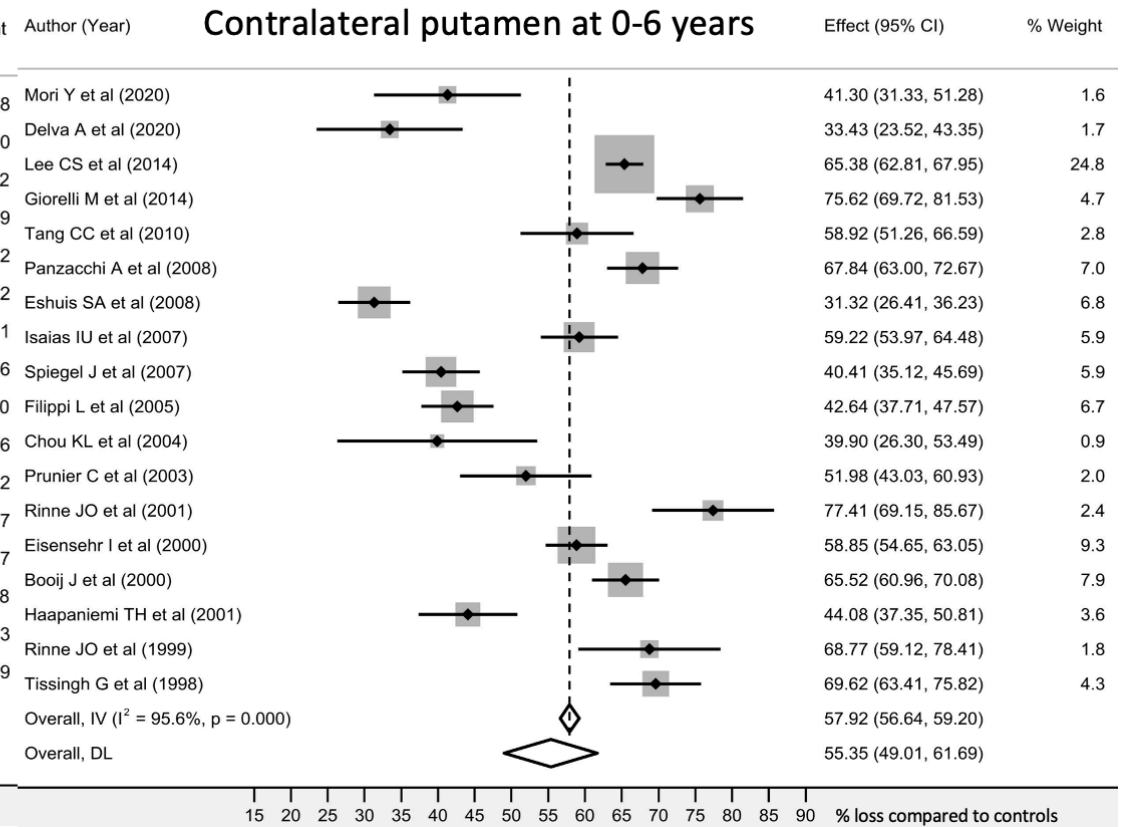

Supplement: MDC3-10-539-s005.pdf [file MDC3-10-539-s005.pdf]
